# Supplementary material for: O2 adsorption and dissociation on an anatase (101) surface with a subsurface Ti interstitial
Source: Royal Society of Chemistry journal article supplement (doi:10.1039/c5cp06958k), 2016-01-01
Supplement: c5cp06958k1.pdf [file c5cp06958k1.pdf]

## Supporting Materials

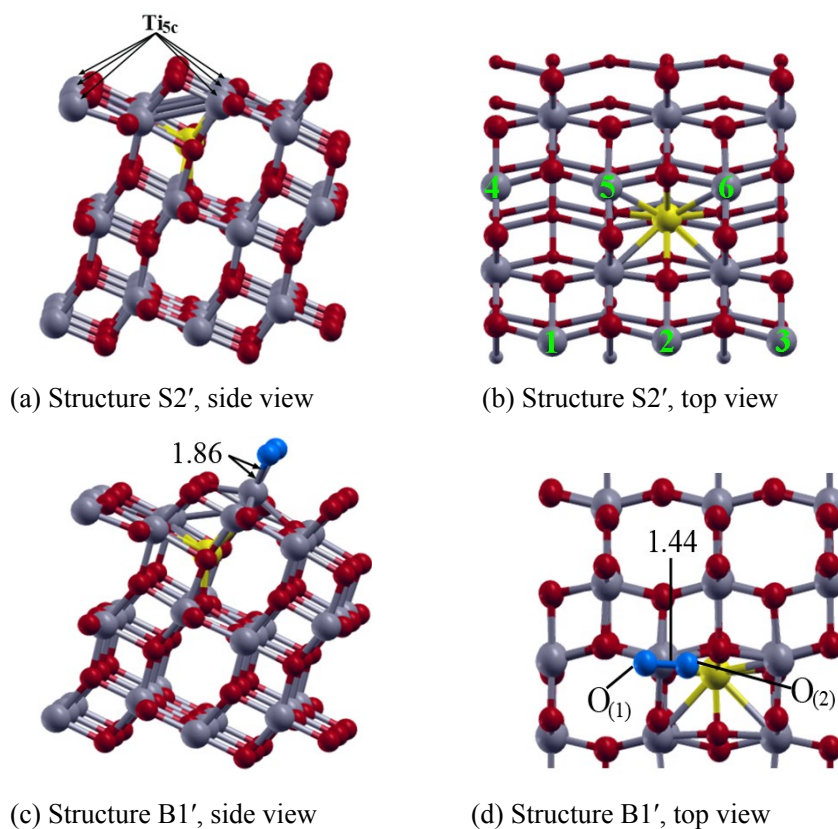

Fig. S1: (a) and (b) configuration of an anatase slab with a subsurface Ti interstitial under a (101) surface (S2'). (c) and (d) the energy favorable adsorption configuration of an oxygen molecule on the surface of S2', (B1').

Adsorption energy of an oxygen molecule on the (101) surface of configuration S2'

|                        |       |       |       |       |
|------------------------|-------|-------|-------|-------|
| S2'                    | 1, 3  | 2     | 4     | 5, 6  |
| adsorption energy (eV) | -1.31 | -1.45 | -0.87 | -2.01 |
